# Supplementary material
Source: PubMed Central journal article supplement (PMC3416471)
Supplement: supp_80.7.2316_IAI-IAI00261-12-s01.pdf [file supp_80.7.2316_IAI-IAI00261-12-s01.pdf]

## **IL-10 polymorphisms are associated with IL-10 production and clinical malaria in young children**

Zhang, Guicheng<sup>1\*</sup>; Manaca, Maria Nelia<sup>2</sup>; McNamara-Smith, Michelle<sup>1</sup>; Mayor, Alfredo<sup>2,3</sup>; Nhabomba, Augusto<sup>2</sup>; Berthoud, Tamara Katherine<sup>3</sup>; Khoo, Siew-Kim<sup>1</sup>; Wiertsema, Selma<sup>1</sup>; Aguilar, Ruth<sup>2,3,4</sup>; Barbosa, Arnaldo<sup>2</sup>; Quintó, Llorenç<sup>3</sup>; Candelaria, Pierre<sup>1</sup>; Schultz, En Nee<sup>1</sup>; Hayden, Catherine M<sup>1</sup>; Goldblatt, Jack<sup>1,5</sup>; Guinovart, Caterina<sup>2,3</sup>; Alonso, Pedro L<sup>2,3</sup>; LeSouëf, Peter N<sup>1</sup>; Dobaño, Carlota<sup>2,3#</sup>

1. School of Paediatrics and Child Health, University of Western Australia, Australia
2. Manhica Health Research Center (CISM), Manhica, Mozambique
3. Barcelona Centre for International Health Research (CRESIB), Hospital Clínic, Universitat de Barcelona, Barcelona, Spain.
4. CIBER Epidemiología y Salud Pública (CIBERESP), Spain
5. Genetic Services of WA, King Edward Memorial Hospital, Perth, Australia

Supplementary Table 1 Associations of IL-10 genotypes in children with IL-10 production capacity (pg/ml) by PBMCs and CBMCs

|                          | Genotypes | N  | GM   | 95% CI |       | p     | P linear     |
|--------------------------|-----------|----|------|--------|-------|-------|--------------|
|                          |           |    |      | Lower  | Upper |       |              |
| <b>SNP IL-10 A-592C</b>  |           |    |      |        |       |       |              |
| IL-10 in CBMC with uRBC  | CC        | 64 | 4.7  | 2.7    | 8.2   | 0.26  | 0.16         |
|                          | CA        | 82 | 8.7  | 5.2    | 14.3  |       |              |
|                          | AA        | 20 | 8.3  | 2.8    | 24.8  |       |              |
| IL-10 in CBMC with iRBC  | CC        | 64 | 5.3  | 3.0    | 9.3   | 0.12  | <b>0.039</b> |
|                          | CA        | 82 | 9.4  | 5.7    | 15.3  |       |              |
|                          | AA        | 20 | 15.6 | 5.3    | 46.0  |       |              |
| <b>SNP IL-10 A-1082G</b> |           |    |      |        |       |       |              |
| IL-10 in CBMC with uRBC  | AA        | 71 | 9.9  | 5.7    | 17.0  | 0.25  | 0.098        |
|                          | GA        | 80 | 5.8  | 3.5    | 9.7   |       |              |
|                          | GG        | 13 | 4.2  | 1.4    | 13.0  |       |              |
| IL-10 in CBMC with iRBC  | AA        | 71 | 13.2 | 7.7    | 22.4  | 0.076 | <b>0.025</b> |
|                          | GA        | 80 | 6.4  | 3.9    | 10.7  |       |              |
|                          | GG        | 13 | 4.2  | 1.5    | 11.9  |       |              |

PBMC: peripheral blood mononuclear cells

CBMC: cord blood mononuclear cells

uRBC: uninfected erythrocytes

iRBC: infected erythrocytes

GM: geometric means

95% CI: 95% confidence intervals

Supplementary Table 2 Associations of IL-10 genotypes in mothers with IL-10 production capacity (pg/ml) by PBMCs and CBMCs

|                                  | Genotypes | N  | GM   | 95% CI |       | p     | P linear |
|----------------------------------|-----------|----|------|--------|-------|-------|----------|
|                                  |           |    |      | Lower  | Upper |       |          |
| <b>IL-10 A-592C</b>              |           |    |      |        |       |       |          |
| IL-10 in maternal PBMC with uRBC | CC        | 57 | 12.4 | 6.7    | 23.0  | 0.52  | 0.47     |
|                                  | CA        | 88 | 11.6 | 7.3    | 18.4  |       |          |
|                                  | AA        | 27 | 20.5 | 7.2    | 58.2  |       |          |
| IL-10 in maternal PBMC with iRBC | CC        | 57 | 18.8 | 10.4   | 34.1  | 0.48  | 0.45     |
|                                  | CA        | 88 | 17.3 | 10.9   | 27.6  |       |          |
|                                  | AA        | 27 | 31.5 | 12.1   | 81.8  |       |          |
| IL-10 in CBMC with uRBC          | CC        | 55 | 4.2  | 2.4    | 7.4   | 0.26  | 0.11     |
|                                  | CA        | 83 | 6.7  | 4.1    | 11.0  |       |          |
|                                  | AA        | 23 | 9.7  | 3.5    | 26.7  |       |          |
| IL-10 in CBMC with iRBC          | CC        | 55 | 5.5  | 3.1    | 9.7   | 0.49  | 0.25     |
|                                  | CA        | 83 | 8.0  | 4.9    | 12.9  |       |          |
|                                  | AA        | 23 | 9.7  | 3.4    | 27.5  |       |          |
| <b>IL-10 A-1082G</b>             |           |    |      |        |       |       |          |
| IL-10 in maternal PBMC with uRBC | AA        | 83 | 14.6 | 8.5    | 25.2  | 0.092 | 0.15     |
|                                  | GA        | 75 | 15.0 | 9.3    | 24.0  |       |          |
|                                  | GG        | 16 | 4.0  | 1.4    | 11.7  |       |          |
| IL-10 in maternal PBMC with iRBC | AA        | 83 | 22.5 | 13.3   | 38.2  | 0.38  | 0.26     |
|                                  | GA        | 75 | 20.5 | 12.8   | 32.9  |       |          |
|                                  | GG        | 16 | 9.7  | 3.4    | 27.0  |       |          |
| IL-10 in CBMC with uRBC          | AA        | 74 | 7.8  | 4.5    | 13.6  | 0.31  | 0.13     |
|                                  | GA        | 73 | 5.4  | 3.3    | 8.8   |       |          |
|                                  | GG        | 16 | 3.4  | 1.4    | 8.1   |       |          |
| IL-10 in CBMC with iRBC          | AA        | 74 | 10.7 | 6.1    | 18.7  | 0.18  | 0.076    |
|                                  | GA        | 73 | 5.6  | 3.5    | 9.1   |       |          |
|                                  | GG        | 16 | 5.0  | 1.8    | 13.6  |       |          |

PBMC: peripheral blood mononuclear cells

CBMC: cord blood mononuclear cells

uRBC: uninfected erythrocytes

iRBC: infected erythrocytes

GM: geometric means

95% CI: 95% confidence intervals

Supplementary Table 3 Associations of IL-10 haplotype (GCA) in mothers and children with IL-10 production capacity (pg/ml) by PBMCs and CBMCs

|                                  | Copies | N  | GM   | 95% CI |       | p     | P linear |
|----------------------------------|--------|----|------|--------|-------|-------|----------|
|                                  |        |    |      | Lower  | Upper |       |          |
| GCA in mothers                   |        |    |      |        |       |       |          |
| IL-10 in maternal PBMC with uRBC | 0      | 92 | 13.4 | 7.8    | 23.1  | 0.76  | 0.47     |
|                                  | 1      | 69 | 18.2 | 4.0    | 81.7  |       |          |
|                                  | 2      | 15 | 12.7 | 9.1    | 17.9  |       |          |
| IL-10 in maternal PBMC with iRBC | 0      | 92 | 21.6 | 12.6   | 37.0  | 0.87  | 0.66     |
|                                  | 1      | 69 | 20.3 | 4.7    | 87.8  |       |          |
|                                  | 2      | 15 | 19.5 | 14.0   | 27.1  |       |          |
| IL-10 in CBMC with uRBC          | 0      | 88 | 8.4  | 4.6    | 15.4  | 0.18  | 0.98     |
|                                  | 1      | 62 | 2.9  | 0.9    | 9.0   |       |          |
|                                  | 2      | 15 | 6.0  | 4.3    | 8.4   |       |          |
| IL-10 in CBMC with iRBC          | 0      | 88 | 12.6 | 6.8    | 23.5  | 0.039 | 0.51     |
|                                  | 1      | 62 | 3.6  | 1.2    | 10.6  |       |          |
|                                  | 2      | 15 | 7.3  | 5.2    | 10.3  |       |          |
| GCA in children                  |        |    |      |        |       |       |          |
| IL-10 in CBMC with uRBC          | 0      | 79 | 7.3  | 4.4    | 12.1  | 0.62  | 0.97     |
|                                  | 1      | 80 | 5.8  | 3.6    | 9.3   |       |          |
|                                  | 2      | 13 | 10.4 | 2.0    | 55.5  |       |          |
| IL-10 in CBMC with iRBC          | 0      | 79 | 8.3  | 5.1    | 13.6  | 0.89  | 0.97     |
|                                  | 1      | 80 | 7.5  | 4.6    | 12.3  |       |          |
|                                  | 2      | 13 | 10.2 | 1.9    | 53.4  |       |          |

PBMC: peripheral blood mononuclear cells

CBMC: cord blood mononuclear cells

uRBC: uninfected erythrocytes

iRBC: infected erythrocytes

GM: geometric means

95% CI: 95% confidence intervals
